# Supplementary material
Source: publisher figshare collection journal article supplement (https://sage.figshare.com/ndownloader/files/20367006)
Supplement: Supplementary file 1 [file 20367006]

## Supplementary Table S4

Unusable and insufficiently codes, Level 1, top five packages, Greenland, 2006-15

| Rank                          | Package name               | Number of deaths | Causes in level (%) | Category name and ICD-10 code                               | Number of deaths |
|-------------------------------|----------------------------|------------------|---------------------|-------------------------------------------------------------|------------------|
| 1                             | Impossible cause for death | 236              | 35.0                | Other ill-defined and unspecified causes of mortality (R99) | 89               |
| 2                             | Senility                   | 162              | 24.0                | Senility (R54)                                              | 128              |
| 3                             | Left heart failure         | 98               | 14.5                | Heart failure (I50)                                         | 72               |
| 4                             | Sepsis                     | 63               | 9.4                 | Other septicaemia (I41)                                     | 51               |
| 5                             | Shock and cardiac arrest   | 22               | 3.3                 | Cardiac arrest (I46)                                        | 10               |
| <b>TOTAL (top 5 packages)</b> |                            | <b>581</b>       | <b>86.2</b>         | <b>TOTAL (top five categories)</b>                          | <b>350</b>       |
| <b>TOTAL (Level 1)</b>        |                            | <b>622</b>       | <b>100.0</b>        |                                                             |                  |

COD = cause of death; ICD-10 = International Classification of Diseases, 10th revision.

Note:

### Packages

ANACONDA groups the unusable mortality codes into the 'packages' of similar unusable codes within each of the four levels of severity. Each package groups together the codes resulting from poor diagnostic practices and coding, resulting in specific, identifiable misdiagnoses.
